# Supplementary material
Source: PubMed Central journal article supplement (PMC5512236)
Supplement: JVI.00736-17_zjv999182745s1.pdf [file JVI.00736-17_zjv999182745s1.pdf]

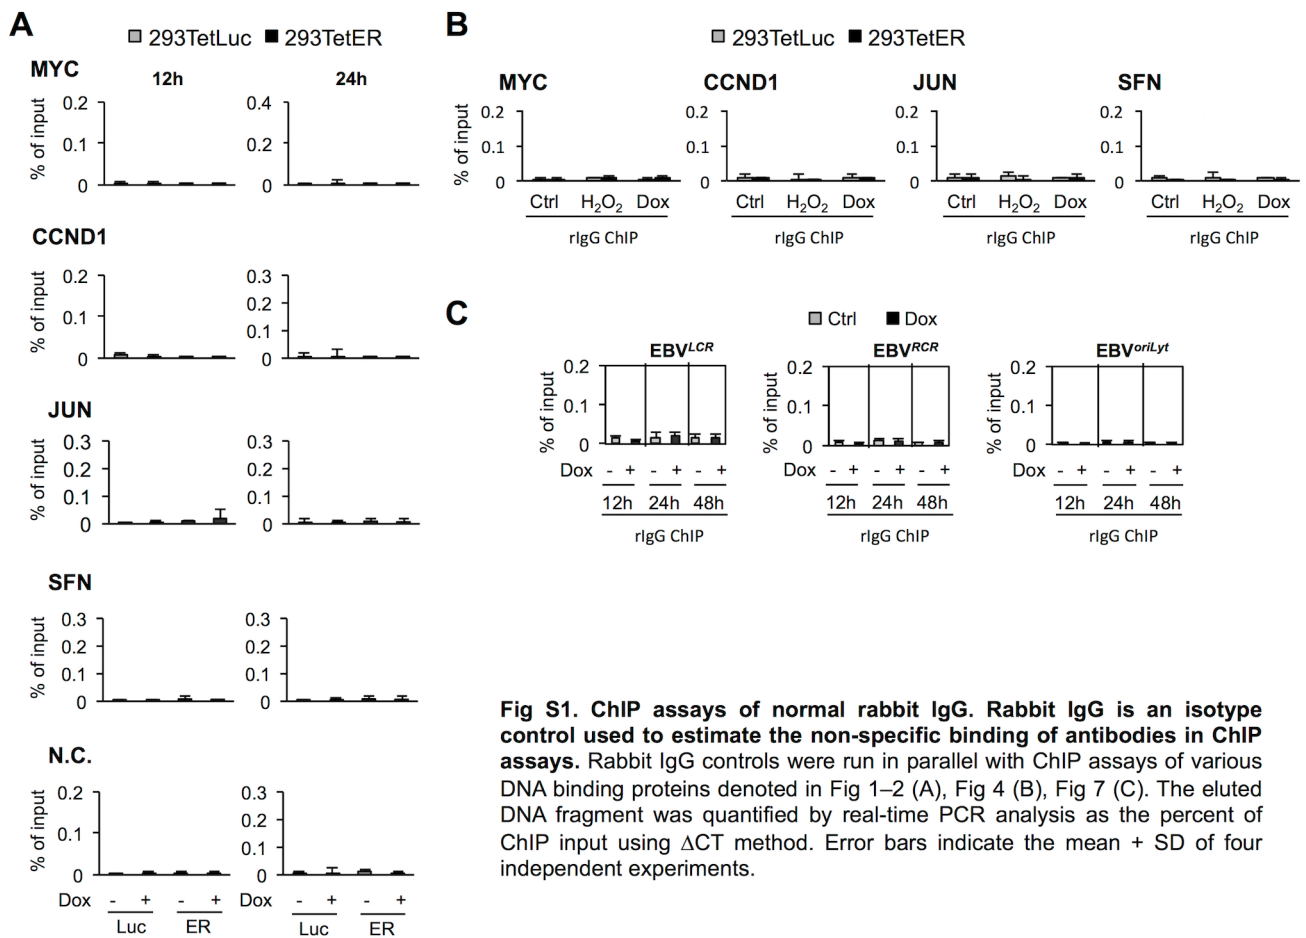

**Fig S1. ChIP assays of normal rabbit IgG.** Rabbit IgG is an isotype control used to estimate the non-specific binding of antibodies in ChIP assays. Rabbit IgG controls were run in parallel with ChIP assays of various DNA binding proteins denoted in Fig 1–2 (A), Fig 4 (B), Fig 7 (C). The eluted DNA fragment was quantified by real-time PCR analysis as the percent of ChIP input using  $\Delta$ CT method. Error bars indicate the mean + SD of four independent experiments.

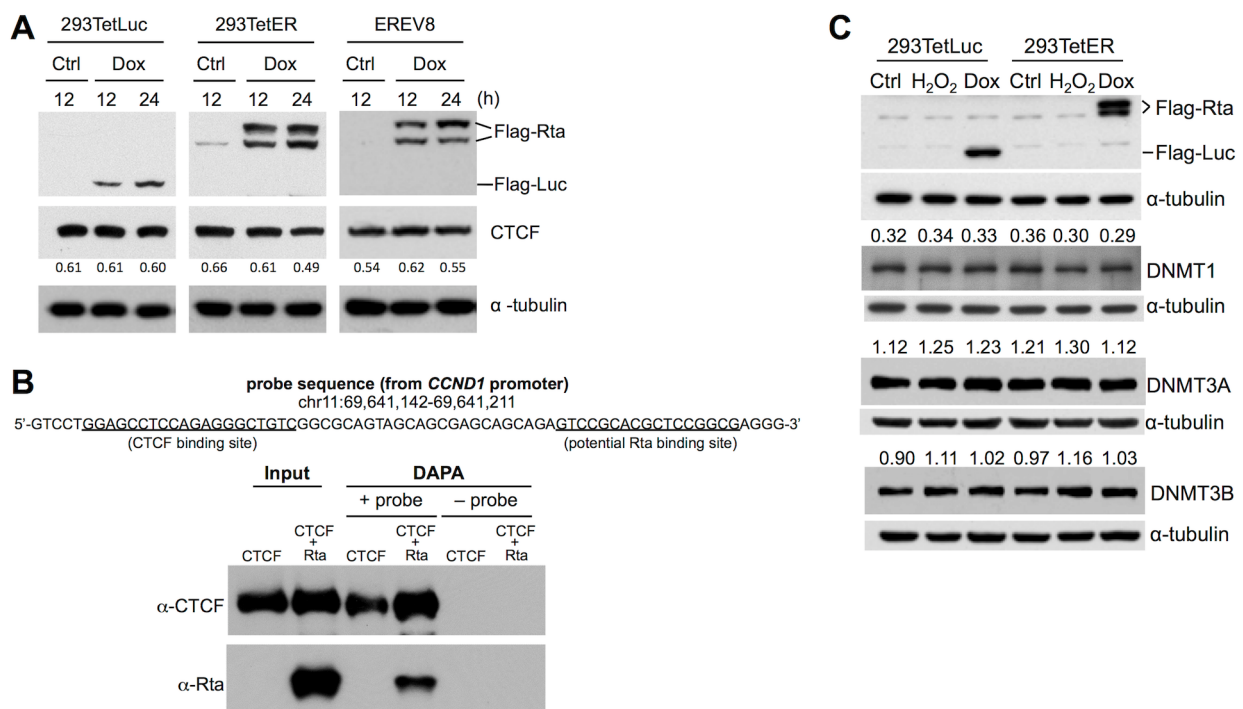

**Fig S2. Direct binding of EBV Rta into DNA does not interfere with CTCF occupancy.** (A) Protein extracts of untreated (Ctrl) and Dox-treated (Dox) 293TetLuc, 293TetER, and EREV8 cells at indicated time points were harvested and subjected to western blot analysis for CTCF and Flag-Luc/Rta expression. Numeric values beneath each band denote fractions of intensity normalized with α-tubulin. (B) DNA affinity precipitation assay (DAPA) of CTCF and Rta. Nuclear extracts of CTCF- or CTCF plus Rta-overexpressed 293T cells were harvested and subjected to DAPA analysis by incubating with (+) or without (-) DNA probes. CTCF and Rta proteins in the inputs (1/30) or DAPA precipitates were detected using a western blot assay. (C) Protein extracts harvested from untreated (Ctrl), 500 μM H<sub>2</sub>O<sub>2</sub>, or 50 ng/ml Dox-treated 293TetLuc and 293TetER cells were subjected to western blot analysis using antibodies of Flag, DNMT1, DNMT3A, DNMT3B, and α-tubulin. Numeric values above each band denote fractions of intensity normalized with α-tubulin.

**Supporting Table S1. List of primers used in the present study**

| <b>Primers for real-time RT-PCR analysis</b>                          |         |                           |        |
|-----------------------------------------------------------------------|---------|---------------------------|--------|
| Gene Name                                                             |         | Primer sequence (5' → 3') | PCR    |
| CCDC86                                                                | Forward | AAGTGAGGAGGCACCAAAGT      | 137 bp |
|                                                                       | Reverse | CGGGGTAAGGCTCTGGTGAT      |        |
| CCND1                                                                 | Forward | CAAGGCCTGAACCTGAGGAG      | 171 bp |
|                                                                       | Reverse | CTTGGGGTCCATGTTCTGCT      |        |
| DHCR7                                                                 | Forward | ACAGAACCGCATCTCAAGGG      | 135 bp |
|                                                                       | Reverse | AGCTGTAAGTGGTCACAAGCC     |        |
| DHCR24                                                                | Forward | ATGCACTCCGTCGAAAACCT      | 126 bp |
|                                                                       | Reverse | TCGAAACGCAGCTTGACGTA      |        |
| ERI3                                                                  | Forward | AGGAGAGTTTTAGATGCTTCTGG   | 113 bp |
|                                                                       | Reverse | AATAAGTGGGAGCCCAGCAC      |        |
| FAM84B                                                                | Forward | GCCGAGCCTACACCTTCAAA      | 94 bp  |
|                                                                       | Reverse | CTACCCGCGGAGAGGTGAAG      |        |
| GAPDH                                                                 | Forward | CAAGAAGGTGGTGAAGCAGG      | 91 bp  |
|                                                                       | Reverse | GCTGTTGAAGTCAGAGGAGACC    |        |
| JUN                                                                   | Forward | GTGCCGAAAAAGGAAGCTGG      | 175 bp |
|                                                                       | Reverse | CTGCGTTAGCATGAGTTGGC      |        |
| MYC                                                                   | Forward | AGCATAATCCTGTCCGTCC       | 226 bp |
|                                                                       | Reverse | CTCAGCCAAGGTTGTGAGGT      |        |
| SFN                                                                   | Forward | GCCCCTGCTGCCTCTGATCG      | 170 bp |
|                                                                       | Reverse | ACACCCAGCAGACATGCTTTCCC   |        |
| TRIB1                                                                 | Forward | TCGCTCGCTCTCATAACAG       | 121 bp |
|                                                                       | Reverse | GAGCCACGAAGCAAATGCAC      |        |
| EBV_BHLF1                                                             | Forward | CGCAACAGTGCCACCAAC        | 73 bp  |
|                                                                       | Reverse | CAGGACCTGGCGGTAGTG        |        |
| EBV_BHRF1                                                             | Forward | GATTCATCAACAGGGCGG        | 89 bp  |
|                                                                       | Reverse | GTCCAGCAAGAAACAAAGTCC     |        |
| EBV_BKRF4                                                             | Forward | GGACGTGAGTGACACTGA        | 157 bp |
|                                                                       | Reverse | GCTCTCGCTGTAGTCAGA        |        |
| EBV_LMP1                                                              | Forward | GGGTCGTCATCATCTCCACC      | 59 bp  |
|                                                                       | Reverse | CCACACCTTCTACGCTGC        |        |
| EBV_LMP2A                                                             | Forward | CGTGAATCTAATGAAGAGCCC     | 81 bp  |
|                                                                       | Reverse | TGGTTGATAGTCCGAGTGACG     |        |
| EBV_Zta (BZLF1)                                                       | Forward | GAGTCAACATCCAGGCTTGG      | 96 bp  |
|                                                                       | Reverse | GCAGCACTACCGTGAGGTG       |        |
| <b>Primers for ChIP assay and DNA methylation analysis</b>            |         |                           |        |
| Gene Name                                                             |         | Primer sequence (5' → 3') | PCR    |
| MYC                                                                   | Forward | CCGGTTTTCGGGGCTTTATC      | 273 bp |
|                                                                       | Reverse | GCTCGGGTGTGTAAGTTCC       |        |
| CCND1                                                                 | Forward | ACAACAGTAACGTACACGGAC     | 228 bp |
|                                                                       | Reverse | TTCCATGGCTGGGGCTCTTC      |        |
| JUN                                                                   | Forward | CGAAAGAACCAGGATCCCGA      | 234 bp |
|                                                                       | Reverse | CACTCGCATAAAGTCACGCAG     |        |
| SFN                                                                   | Forward | TTTATGGGCTCTGTCGAGGC      | 263 bp |
|                                                                       | Reverse | TTCCGGCTCTGCAGTAAAGG      |        |
| Negative control                                                      | Forward | TATGTGGAGCGGCTTCTCGG      | 148 bp |
|                                                                       | Reverse | GCTCAGATCCTGCAGGTACAA     |        |
| EBV_LCR                                                               | Forward | TCCCTACTCTCCACGGGATG      | 208 bp |
|                                                                       | Reverse | GCTGGGGGTGTCAACAAAGA      |        |
| EBV_RCR                                                               | Forward | GGAAGAGTACCCAGTGACG       | 165 bp |
|                                                                       | Reverse | TGTTGGGTAGATGGCGAGAC      |        |
| EBV_oriLyt                                                            | Forward | TAGAGGTCCGCGAGATTTGG      | 213 bp |
|                                                                       | Reverse | AGGAACCTAGCTGAATCCTACCT   |        |
| <b>Primers for determination of intracellular viral genome copies</b> |         |                           |        |
| Gene Name                                                             |         | Primer sequence (5' → 3') | PCR    |
| EBV_DNA Pol (BALF5)                                                   | Forward | CGGAGTTGTTATCAAAGAGGC     | 135 bp |
|                                                                       | Reverse | CGAGAAAGACGGAGATGGC       |        |
